# Reconstruction of hundreds of reference ancestral genomes across the eukaryotic kingdom

Matthieu Muffato<sup>1,2\*</sup>, Alexandra Louis<sup>1\*</sup>, Nga Thi Thuy Nguyen<sup>1</sup>, Joseph Lucas<sup>1</sup>,  
5 Camille Berthelot<sup>1,3†</sup>, Hugues Roest Crolius<sup>1†</sup>

<sup>1</sup> Institut de Biologie de l'École Normale Supérieure (IBENS), CNRS UMR8197, INSERM U1024, 75005 Paris, France.

<sup>2</sup> Current address: Wellcome Sanger Institute, Wellcome Genome Campus, CB10 1SA, Hinxton, United Kingdom

10 <sup>3</sup> Current address: Institut Pasteur, Université de Paris, CNRS UMR3525, INSERM UA12, Comparative Functional Genomics group, F-75015 Paris, France.

\* First authors

† Corresponding authors

## 15 **Abstract**

Ancestral sequence reconstruction is a fundamental aspect of molecular evolution studies, and can trace small-scale sequence modifications through the evolution of genomes and species. In contrast, fine-grained reconstructions of ancestral genome organisations are still in their infancy, limiting our ability to draw comprehensive views of genome and karyotype evolution.  
20 Here we reconstruct the detailed gene contents and organisations of 624 ancestral vertebrate, plant, fungi, metazoan and protist genomes, 183 of which are near-complete chromosomal reconstructions. Reconstructed ancestral genomes are similar to their descendants in terms of gene content as expected and agree precisely with reference cytogenetic and *in silico* reconstructions when available. By comparing successive ancestral genomes along the  
25 phylogenetic tree, we estimate the intra- and inter-chromosomal rearrangement history of all major vertebrate clades at high resolution. This freely available resource introduces the possibility to follow evolutionary processes at genomic scales in chronological order, across multiple clades and without relying on a single extant species as reference.

30 **Keywords** – ancestral genome, karyotype evolution, chromosomal rearrangement, genome evolution

## Introduction

35 Biological sequences have long been recognized as a document of evolutionary history<sup>1</sup>,  
where accumulated mutations record relationships between species as well as the dynamics  
underlying their evolution. Given sufficient genetic information across species, the temporal  
accumulation of these mutations can be traced back in time to reconstruct sequences and  
genomes in their long-lost common ancestors. These ancestral reconstructions are the  
40 backbone of much of today's methodologies in molecular evolution, including phylogenetic  
trees<sup>2-4</sup> and sequence selection tests<sup>5,6</sup>. The reconstruction of ancestral sequences, and  
especially genes, has been extensively studied since the dawn of sequencing: mature methods  
exist to retrace the history of sequence substitutions and leverage changes in substitution  
45 dynamics to answer specific evolutionary questions. However, DNA mutations are not limited  
to sequence substitutions: genomes are also affected by larger scale mutational events such  
as duplications, deletions, sequence inversions or chromosomal rearrangements, all of which  
can affect genome function, species fitness, and evolution. In extant species, large-scale  
mutations are a major determinant of disease as they can disrupt functional sequences<sup>7-9</sup> as  
well as reorganize functional structures within the genome<sup>10-12</sup>. From an evolutionary  
50 viewpoint, large-scale mutations are a well-documented source of innovations: they can  
produce new genetic combinations that contribute phenotypic novelty<sup>13,14</sup>, but can also have  
more indirect effects such as locally suppressing recombination<sup>15,16</sup>, favouring allele hitchhiking  
and rapid selection<sup>17,18</sup>. For example, genomic rearrangements have been shown to associate  
with changes in brain gene expression between humans and chimpanzees<sup>19</sup>, to underlie the  
55 evolution of intersexual development in moles<sup>20</sup> and variations in reproductive morphs in  
ruffs<sup>21</sup>. Despite their tremendous functional and evolutionary importance, large scale  
mutational events are less extensively studied and not as well-understood than sequence  
substitutions. In particular, the reconstruction of ancestral genomes and karyotypes lags  
behind that of ancestral sequences, making it difficult to study the evolutionary dynamics and  
60 impact of rearrangements, duplications and deletions over many species and within rigorous  
theoretical frameworks.

With the advent of massive sequencing projects ambitioning to obtain high-quality reference  
genomes for thousands of species across all kingdoms of life<sup>22</sup>, evolutionary genomics faces  
both fresh opportunities and serious challenges to integrate this flow of data into usable  
65 comparative frameworks. Along with whole-genome alignments<sup>23</sup>, ancestral genome and  
karyotype reconstructions across large clades is one of the most promising outcomes of these  
projects. The goal of these reconstructions is to provide a plausible organization of genomic  
sequences in one or many extinct common ancestors of a group of species of interest. Several

paleogenomics strategies have been explored to reconstruct the sequence content and  
70 ordering of ancestral genomes. Methods based on double-cut-and-join (DCJ) algorithms  
endeavour to reconstruct rearrangement scenarios resulting in observed extant genome  
structures<sup>24,25</sup>. These methodologies become increasingly computationally expensive and in  
many cases intractable for sets of large, complex genomes, which at this time has only been  
75 overcome by reducing significantly reconstruction resolution<sup>26–28</sup>. Other methods attempt to  
reconstruct a parsimonious sequence ordering in the ancestor based on orthologous sequence  
adjacencies in extant genomes, under the assumption that genomic rearrangements are  
unlikely to result in the same sequence organization several times independently. These  
methods can be applied to different types of markers, typically either alignable sequence  
80 blocks or individual genes, and are appropriate for small<sup>29</sup> and large genomes such as  
vertebrates or plants<sup>30,31</sup>. However, it remains unclear whether current methods can provide  
high-resolution reconstructions and scale to the large genomic resources available in  
comparative genomics databases. At this time, only two ancestral genomic reconstruction  
resources are widely available to the community: AncestralGenomes<sup>32</sup>, which provides 111  
ancestral gene content reconstructions, but not their order ('bags of genes'), and  
85 DESCHRAMBLER<sup>33</sup>, which offers chromosome-complete reconstructions for 7 mammal and  
14 bird ancestors, but with limited sub-chromosomal resolution (100-300 kb sequence blocks)  
and dependent on a reference genome. Here, we introduce a new resource containing 624  
ancestral genomes reconstructed over the vertebrate, plant, fungi, metazoan and protist  
clades, at gene-scale resolution, where a third of the ancestral genomes reach chromosomal-  
90 complete assemblies. This drastic change in magnitude is powered by an iterative, parsimony-  
based ancestral genome reconstruction algorithm, named AGORA, which we describe here.  
We show that AGORA is efficient, flexible and scales to integrate hundreds of large genomes  
and to reconstruct their common ancestors at every node in the species phylogeny with  
relatively modest computational costs. Along with the open-source algorithm, all precomputed  
95 ancestral genome reconstructions are publicly available within the Genomicus<sup>34,35</sup> database  
(<https://www.genomicus.bio.ens.psl.eu/genomicus>), and benefit from the full browsing and  
comparative genomics tool infrastructure of the database. The database is regularly updated  
since 2010 to reflect reference genome improvements and represents a perennial resource for  
high-quality, high-resolution ancestral genomes for the molecular evolution community across  
100 disciplines and model phylogenetic clades.

## Results

### **A vast resource of eukaryotic reference ancestral genomes for evolutionary genomics**

To facilitate the investigation of chromosomal and local genome dynamics across evolution,  
105 we have developed an extensive resource of ancestral genome reconstructions that spans  
large portions of the eukaryotic tree of life. This resource is based on an algorithm named  
AGORA (Algorithm for Gene Order Reconstruction in Ancestors), which computes highly  
contiguous, near-exhaustive reconstructions of the ancestral gene order at every bifurcation  
110 in the species tree, based on gene order information in the extant species of the clade (Figure  
1a). While AGORA can be installed as a standalone package for tailored research applications,  
we routinely precompute and release the complete set of ancestral vertebrate genomes for  
every update of the Ensembl database as well as for a broad selection of plant and fungi clades  
as part of the Genomicus synteny database<sup>36</sup>. At the time of submission, Genomicus contains  
115 a total of 624 ancestral genomes readily available for download across the Vertebrates, Plants,  
Metazoa, Protists and Fungi databases (Supplementary table S1). These ancestral genomes  
can be explored and manipulated using the different utilities of the Genomicus web server<sup>36</sup> to  
perform karyotype comparisons, extraction and evolutionary tracing of conserved synteny  
blocks (Figure 1b), and local gene-to-gene synteny visualization across ancestral and extant  
species (Figure 1c).

### **AGORA: a fast and efficient algorithm to reconstruct ancestral gene order at every node in a phylogenetic tree**

AGORA is a parsimony-based algorithm that estimates the content and order of genes in the  
ancestor of a group of extant species for which reference genomes are available (Figure 2,  
Figure S1). Briefly, the method iteratively extracts commonalities between pairs of extant  
125 genomes to infer characteristics inherited from their last common ancestor, and present in  
every ancestor along the evolutionary branches leading to each extant genome. AGORA takes  
as input a forest of gene phylogenetic trees, corresponding to all the gene families present in  
the extant genomes with their orthology and paralogy relationships, and the gene orders in  
each extant genome. First, AGORA uses the phylogenies of extant genes to infer the gene  
130 content of every ancestor along the species tree (Figure S2). Second, AGORA compares the  
gene orders of every pair of extant species to identify orthologous genes adjacent and in the  
same orientation in both species, and presumably inherited from their last common ancestor  
(Figure 2a). For every ancestor in the species tree, the algorithm extracts the subset of  
informative pairwise extant species comparisons (Figure 2b) and integrates the gene  
135 adjacency comparisons into a weighted graph, where nodes represent ancestral genes, and  
edges adjacencies supported by pairwise extant species comparisons. The weights

correspond to the number of comparisons supporting that these genes were adjacent in this ancestor (Figure 2c,d). Ideally, this process would result in a linear graph representing the ancestral gene order, as genome rearrangements are unlikely to produce the same gene  
140 adjacencies independently in different lineages<sup>37-40</sup>. However, errors in the resolution of orthologs and paralogs in the original gene trees can result in branching in the graph. AGORA linearizes the graph by iteratively removing low-weight edges to obtain a parsimonious reconstruction of the oriented gene order in the ancestral genome (Figure 2e). AGORA includes extensions of this algorithm to deal with larger errors in the input gene trees, by  
145 identifying a set of constrained genes that are close to being single copy in most species, and can be reliably used for gene order reconstruction. In this mode, AGORA adds the non-constrained genes in a second stage. The algorithm is presented in detail in the Supplementary Information (Figures S1-9). The *in-silico* performances of AGORA have been tested on a previously-used benchmark of genome evolution simulations<sup>33</sup>, achieving 98.9% agreement  
150 with the reference (sensitivity 99.3%; precision 99.6%; Methods), similar to other state-of-the-art ancestral genome reconstruction methods<sup>33</sup>. On a different, more realistic, benchmark based on simulations that are not restricted to single-copy genes, AGORA achieves 95.4% agreement, while DESCHRAMBLER's performance drops to 68.6% (Supplementary Material), highlighting AGORA's ability to successfully deal with gene duplications and other complex  
155 evolutionary scenarios.

In practice, AGORA is highly flexible as it only requires the protein-coding gene annotations of the extant species and the set of precomputed gene trees in a standard format, which can be downloaded from a variety of genome resource initiatives for many species groups. AGORA can be used with other markers than protein-coding genes, such as conserved non-coding  
160 elements; however, due to unreliability of phylogenetic trees for those sequences, we recommend limiting the reconstructions to the order of protein-coding genes for best performances. AGORA can also be used iteratively to assemble blocks of markers and scaffold them over several rounds of reconstruction into larger contiguous ancestral regions (CARs). We propose several workflows customized for different clades and applications as part of the  
165 AGORA package (Figure S1).

Here, to demonstrate the capabilities of AGORA, we use two datasets from distant eukaryotic clades, with different numbers of species, genes, and variable gene tree reliability: i) a dataset of 93 vertebrates and 5 outgroups and their 23,528 gene trees, including a total of 1,814,614 extant protein-coding genes, and leading to the reconstruction of 81 ancestral genomes; and  
170 ii) a dataset of 58 plant genomes and 8 outgroups, corresponding to 48 ancestral genomes (Methods; Supplementary table S4 and Supplementary File 1).

## Reconstructions of highly contiguous, chromosome-scale assemblies of key ancestral genomes

For every ancestral genome, we provide two valuable results: the gene set, and an assembly of their ancestral organization. To evaluate the completeness and accuracy of the ancestral gene sets, we first compare the total number of genes inferred in an ancestor to those of its descendant extant genomes. While very distant genomes can contain widely different numbers of genes, AGORA is designed to be used within clades where synteny is reasonably conserved, such as vertebrates, grasses or *Saccharomycetales* yeasts, and where genomes typically contain similar numbers of genes. We find that our methodology accurately estimates ancestral gene contents that are consistent with those of the descending clades, up to evolutionary distances of over 300 My (Figure 3a). We also find that the vast majority of clade-relevant BUSCO (Benchmark Universal Single Copy Orthologs)<sup>41</sup> reference sets are present as single copy genes in our inferred ancestral gene sets (Figure 3b). In addition, we also confronted our inferred ancestral gene contents for seven key vertebrate ancestors to those calculated by Ancestral Genomes, another effort to estimate the ancestral gene content - but not gene order - at different evolutionary nodes<sup>29</sup>. Ancestral Genomes relies on the PANTHER database<sup>42</sup> and therefore uses an independent set of extant genomes and gene trees. AGORA and Ancestral Genomes both infer highly similar gene contents for the same ancestors (Figure 3c).

The other output of AGORA is the reconstruction of the putative gene order in each ancestral genome along the species tree. The quality of an ancestral genome reconstruction can be evaluated by two criteria: contiguity, and consistency with evolutionary and biological evidence. Contiguity represents the size of the genomic regions that can be assembled into contiguous ancestral regions (CARs), akin to measures of assembly quality for reference genome sequences. For 37 vertebrate ancestral genomes and 13 plant ancestral genomes in our test set, we obtain chromosome-scale assemblies with a small number of long CARs containing hundreds of ordered and oriented genes, corresponding to a best approximation of the ancestral karyotype (Figure 3a). These chromosome-level assemblies include over 70% of the ancestral genes, which is comparable to well-assembled extant reference genomes in those clades (Figure S10). Most other ancestral genomes are assembled into fewer than 100 subchromosomal gene blocks containing over 70% of the ancestral gene content (Figure S11). As expected, the contiguity of ancestral genome reconstructions is overall high in recent ancestors and decreases sharply after 100 My, decaying to large numbers of short, unassembled gene blocks for very ancient ancestors such as the *Tetrapoda* and *Vertebrata* ancestors (Figure 3a). However, perhaps counterintuitively, AGORA performs better in some key older ancestors than in comparatively younger ancestral genomes. For example, the

genome of *Boreoeutheria*, the ancestor of most placental mammals (approx. 95 Mya), is a near-complete assembly comprising 25 large CARs covering 18,430 genes (80% of the total ancestral genome), while the genome of *Afrotheria*, the ancestor of elephant and hyrax (approx. 90 Mya), is appreciably less contiguous with 70% of genes in 83 CARs. This reflects the position of these ancestors in the species tree relative to the sampling of sequenced extant genomes. As previously demonstrated<sup>43</sup>, ancestors that precede evolutionary radiations are ideally positioned for ancestral genome reconstruction, as their many outgroup and descendant lineages offer a large number of informative pairwise comparisons ( $N_i$ ). Overall, AGORA's ancestral reconstruction contiguity correlates with the  $N_i$ /age ratio (Figure S12). Because sequencing efforts have largely targeted organisms within species-rich phyla such as placental mammals or monocotyledon plants, the key ancestors to these widely-studied subclades are particularly well-reconstructed by our methodology, which will be of high value to evolutionary and functional studies. Ultimately however, with the advent of massive sequencing undertakings such as the Vertebrate Genome Project, genome documentation in under-sampled clades will increase dramatically and we expect that most ancestral genomes in the Genomicus database will eventually become chromosome-level assemblies.

## 225 **Recapitulation of evolutionary evidence and curated *in-silico* paleogenomics reconstructions**

Accuracy of ancestral genome reconstructions is appreciably more difficult to evaluate than completion, as the true ancestral genome sequences are inaccessible at the evolutionary scales we study. However, several ancestral genomes have garnered longstanding interest from the evolutionary genomics community, resulting in a large body of biological evidence regarding their overall organization. In vertebrates, one of the most studied ancestral genomes is *Boreoeutheria*, the 95 My-old ancestor to most placental mammals including primates, rodents, hooved mammals and carnivores, with the exception of afrotherians (elephants) and xenarthrans (sloths, anteaters, armadillos), along with the *Eutheria* ancestor (102 My old, ancestral to boreoeutherian mammals and afrotherians) and the *Simian* ancestor (45 My old, ancestral to platyrrhine and catarrhine primates). Landmark ancestral *Eutheria*, *Boreoeutheria* and *Simian* karyotypes have previously been reconstructed by integrating dozens of mammalian homology comparisons using fluorescent DNA probes, a technique known as chromosome painting<sup>44,45</sup>. This analysis suggested that the ancestral placental genome comprised 23 pairs of chromosomes, and traced the large-scale rearrangements that resulted into the karyotypic arrangement of the human genome. The *Boreoeutheria* ancestral genome organisation inferred by AGORA contains 25 large CARs and is highly congruent with the cytogenetics-based reference karyotype (Figure 4a). AGORA recovers all ancestral chromosomal arrangements supported by cytogenetics evidence without requiring manual

assembly or curation. The only exception is the ancestral linkage of human chromosomes 10  
245 and 12 alleged by cytogenetics data (Figure 4b-d), which is supported neither by AGORA, nor  
by the state-of-the-art reconstruction by DESCHRAMBLER or other *in-silico* ancestral genome  
reconstruction methods<sup>33</sup>. Detailed manual investigation of inconsistencies between the  
ancestral reconstructions by AGORA and the cytogenetics references reveals that most  
250 differences are the result of the lower resolution of the chromosomal painting methodology,  
and confirm our proposed assembly (Figures S14-15). At the infrachromosomal scale, we  
found that the genomic organization of the *Boreoeutheria* genome inferred by AGORA is in  
near perfect agreement with that of DESCHRAMBLER (Figure 4c; Methods). However, our  
reconstructed *Boreoeutheria* genome is more complete and includes the ancestral locations  
255 of an additional 2,023 genes (8% of the ancestral gene set). Altogether, these results support  
that the gene-based reconstruction algorithm of AGORA is highly consistent with current  
ancestral reconstruction methods, while providing a significant increase in resolution for the  
study of local genomic events.

We also compared the genome of *Poaceae*, the 50 My-old ancestor of grasses, reconstructed  
by AGORA to an earlier reference ancestral karyotype<sup>46</sup> obtained by another parsimony-based  
260 method to reconstruct ancestral adjacencies<sup>30</sup>. Again, the ancestral genome reconstructed by  
AGORA closely recapitulates the state-of-the-art knowledge regarding the organization of the  
ancestral grass karyotype (Figure 4e), while providing access to a fine-scale reconstruction of  
the ancestral gene order that was unavailable to date.

### **A scalable framework to integrate genomic data across entire phylogenies**

265 A major strength of AGORA resides in its ability to compute the gene order of every ancestor  
in a phylogeny using different subsets of the same extant genome comparisons. In a context  
where new species genomes are being sequenced with increasing speed and accuracy,  
comparative genomics need methods that can integrate evolutionary information along the  
species tree and across lineages without relying on a single extant genome as reference.  
270 Using the legacy architecture of the Genomicus synteny database<sup>34,35</sup>, which is updated with  
every new release of the Ensembl database, we tested how our methodology scales with the  
number of extant reference genomes available as well as their quality (Supplementary figure  
S13). Ensembl Compara v.101 included the reference sequences of 264 vertebrate species  
and 5 outgroups, for a total of 5,539,325 extant protein-coding genes organised into 62,478  
275 gene trees. Using this information, AGORA reconstructs a total of 265 ancestral genomes  
along the species tree in 6 hour and 50 minutes on a Linux machine with 4 CPUs and ~80 GB  
RAM (Supplementary table S2). AGORA is therefore computationally inexpensive and can be  
run on a desktop machine for small to medium datasets. However, AGORA can also be



280 parallelized and is optimized for usage on a computing cluster for large applications and database updates (Supplementary Information).

Overall, the quality of key ancestral genomes increases as new extant genomes are included in the database (Supplementary figure S13). The introduction of high-quality reference genomes in under-represented clades over time has contributed to the reconstruction of previously inaccessible ancestors, such as *Strepsirrhini*, the ancestor of lemurs, bushbabies and lorises, and more recently *Chiroptera*, the ancestor of bats. Interestingly, we observed that even the inclusion of low-coverage, fragmented reference genomes significantly improves ancestral genome reconstructions. This is likely because different reference genomes are generally assembled independently, and assembly errors rarely produce the same erroneous gene arrangements from one genome to the next. As AGORA only considers conserved gene adjacencies as potentially ancestral, the additional information from correctly assembled scaffolds offsets the noise introduced by assembly errors, which are discarded as not conserved. We therefore argue that the inclusion of low-cost, fragmented reference genomes in comparative genomics databases serves a purpose beyond gene-based analyses.

### **Ancestral genomes as backbones for evolutionary studies**

295 In this section, we illustrate how our inferred ancestral genomes can serve a powerful resource for genome evolution studies. As a case study, we used ancestral reconstructions to investigate the patterns of karyotypic rearrangements that occurred during the evolution of mammals, birds and ray-finned fish (Figure 5). These three groups represent the main jawed vertebrate (*Euteleostomi*) lineages, whose respective chromosomal dynamics have been documented using comparative genetics, cytogenetics, and genomics approaches across different taxonomic groups. We selected 73 well-reconstructed ancestors and their 74 extant descendants (15 birds and reptiles, 41 mammals, 18 fish; Methods) from Genomicus Vertebrates database v.102, which contains a total of 269 extant and 265 ancestral genomes. We then compared consecutive genomes on all 131 branches of the phylogenetic tree, representing a combined time of about 5 billion years of independent evolution, and traced gene adjacencies that were rearranged on each branch (Methods). In total, we identified 7,145 rearrangement breakpoints that occurred along the 131 branches (average rate 1.45 breakpoint/million years), most of which are intrachromosomal. We also identified 1,370 interchromosomal rearrangements (translocations, fusions or fissions) with an average rate of 0.28 rearrangement per million year (Figure 5a; Supplementary table S3). Comparing rates per million years, and restricting the analysis to the 105 branches longer than 5 My to avoid small sample distortions, we confirm that birds and reptiles have more stable chromosomal structures than mammals, as previously reported<sup>47,48</sup>, with lower rates of interchromosomal rearrangements (p-value = 3.8e-06, Wilcoxon test; Figure 5b). Fish in turn display higher

315 intrachromosomal breakpoint rates than mammals, birds and reptiles (teleosts versus  
saurians, p-value = 0.0181; teleosts versus mammals, p-value = 0.0532, Wilcoxon test),  
consistent with the rediploidisation process following the whole genome duplication that  
occurred in this phylum<sup>49</sup>, yet they display a uniformly high karyotypic stability.

Interestingly, a few branches in placental mammals stand out as having strikingly high  
320 rearrangement rates. For instance, the gibbon lineage is the outlier of our analysis, having  
experienced 60 interchromosomal rearrangements in 25 My, confirming previous observations  
that this is a fast-evolving lineage compared for example to the human lineage<sup>50</sup> (Figure 5c).  
The dog genome was also subject to high rates of rearrangement, especially compared to its  
sister branch leading to the slowly evolving sea lion genome, which only changed through  
325 three chromosome fusions compared to their *Caniformia* ancestor<sup>51</sup>. The lineage leading to  
*Muridae* is notable for a high rate of intrachromosomal breakpoints combined with multiple  
interchromosomal rearrangements but associated to a stable chromosome number, consistent  
with cytogenetic studies of different murid clades<sup>52,53</sup>.

## 330 **Discussion**

Biology is a historical science, but this historical dimension is often ignored because the  
records required to document ancestral states are missing. Without this chronological  
perspective, the reasons why contemporary biological systems are organised as they are will  
continue to elude us. In practice, this information gap hinders our ability to integrate  
335 conclusions across different living models, and to draw the full benefits of comparative  
genomics. Ancestral genomes are fundamental blocks of the conceptual framework aiming to  
address this problem. They complement fossils as biological timepoints, as they are a  
theoretical representation of the precise divergence between two lineages, while fossils  
represent true extinct species but whose exact phylogenetic position is often unclear. As  
340 ancestral genomes encapsulate all the genes present in the ancestral organism as well as  
their structural organisation, they will enable detailed investigations of developmental and  
metabolic pathways evolution, such as the expansion and contraction of specific gene families  
over time; the contribution of genome structure changes to evolutionary transitions and  
speciations; and the tracing of evolutionary innovations through reorganisation of functional  
345 gene arrangements. Additionally, ancestral genomes can act as unique reference points to  
compare multiple descendant genomes, removing the bias of relying on an extant genome as  
central reference. This property makes them powerful tools to identify, measure and study  
lineage-specific genomic events as well as clade-wide trends.

As genome sequencing costs continue to decrease, reference genomes are becoming widely  
350 available for model and non-model species alike. At the time of writing, the NCBI database  
accounts for a total of 8,505 eukaryote, 32,172 bacterial and 1,909 archaeal whole genome  
sequencing projects, and dedicated efforts such as the Vertebrate Genome Project<sup>54</sup> promise  
to deliver extensive phylogenetic coverage across many clades. Integrating sequence and  
genome organization evolution over such massive phylogenetic samplings remains a  
355 challenge. Many phylogenomics projects still rely on sequence alignments as a means to study  
how genome organization evolves<sup>33,48</sup>. Aligning whole genomes is computationally expensive,  
and while new methodologies are emerging to step up to the challenge<sup>23,55</sup>, the requirements  
to handle hundreds of genomes remain out of reasonable reach for many. Additionally,  
identifying conserved and rearranged regions from whole-genome alignments becomes  
360 technically difficult as phylogenetic distance increases, especially in large genomes where a  
significant fraction of the sequence is non-coding and repetitive. Due to these limitations, the  
evolution of genome organization is typically studied at large scale, but low resolution, and/or  
in a limited sampling of species - often those included in publicly available, reference  
multispecies alignments. Marker-based ancestral genome reconstructions provide an  
365 alternative to methods based on whole-genome alignments by relying on gene phylogenies  
instead, which require much more modest computational infrastructures and scale up to  
hundreds of genomes with relative ease. As algorithms mature, ancestral genomes such as  
presented here could become enriched with many more features, including non-coding  
sequences such as ancestral repeat elements, non-coding RNA genes or regulatory elements,  
370 and serve as organizational maps for reconstructed or fossil nucleotide sequences. In the  
future, as polymorphism information becomes available for more extant species, we may even  
expect to see ancestral genomes move on from unique references to compendiums,  
representing structural genomic variation present at any given point in time – opening the door  
from increasingly sophisticated population genomics models of molecular evolution.

375

## Methods

### Data collection

380 Genes and gene trees were downloaded from in Ensembl v.92<sup>56</sup>, and Ensembl Plants v.41<sup>57</sup>.  
Ensembl v.92 gene trees were edited for poorly supported duplication nodes as previously  
described<sup>58</sup>, as part of the standard build procedure for the Genomicus synteny database. Of  
note, this step only marginally improves ancestral genome reconstructions and is not a  
prerequisite to use AGORA. The species trees for the extant and ancestral genomes from  
385 Ensembl v.92, and Ensembl Plants v.41 are described in Supplementary File 1.

### Ancestral genome reconstructions

Ancestral gene sets and gene orders were reconstructed for 82 ancestors on Ensembl v.92  
data using AGORA with two passes and a tree parameter of 0.35, and for 41 plant ancestors  
in two multi-integration passes without tree selection (Supplementary Table S4). The details  
390 of the AGORA algorithm, validations by evolutionary simulations, and suggested procedure to  
select an optimal tree parameter are detailed in Supplementary Information.

### Statistics on ancestral genomes

Ancestral genome contiguity was measured using L70 and G50 metrics. L70 is the smallest  
number of CARs adding up to 70% of the total genome length, measured in gene units. G50  
395 is the length of the ancestral CAR such that 50% of the total genome length, measured in gene  
units, is contained in larger CARs. Vertebrate chromosomal assemblies have a L70 < 100 and  
G50 > 450 and plant chromosomal assemblies have a L70 < 20 and a G50 > 450. These  
values correspond to well-assembled extant genomes (Figure S10) from these respective  
clades. Other assemblies were considered subchromosomal.

### 400 Comparisons to reference ancestral gene sets

We downloaded the Benchmark Universal Single Copy Orthologs (BUSCO) sets v.3<sup>41</sup>, based  
on OrthoDB v.9<sup>59</sup>. BUSCO gene identifiers were converted to Ensembl gene IDs using the  
conversion tables provided by OrthoDB. A BUSCO orthogroup is a set of near-1-to-1  
orthologous genes across sequenced genomes of a relevant phylum. An ancestral gene  
405 inferred by AGORA was identified as a BUSCO if two or more of its extant descendant genes  
are contained in the same orthogroup. When a single ancestral gene had descendants in more  
than one BUSCO orthogroup, we chose the orthogroup with highest overlap. We then  
computed the number of BUSCOs matched to a single ancestral gene, to two or more  
ancestral genes (dubious duplication), and absent from the ancestral genome reconstructed  
410 by AGORA (missing gene). Independent ancestral gene sets were downloaded from Ancestral  
Genomes (AG)<sup>32</sup>, based on PANTHER v.13.1<sup>42</sup>. Because AG and AGORA use different sets

of extant species, we only considered ancestral genes with descendants in one of their common species for comparison (human for all ancestors except *Murinae* and *Laurasiatheria* where mouse and dog were used, respectively). AG ancestral genes were converted from UniProtKB IDs to Ensembl gene IDs using the correspondence tables provided by Ensembl BioMart, and compared with the gene sets in the ancestral genomes reconstructed by AGORA.

### Comparison of AGORA reconstruction with DESCHRAMBLER Eutherian ancestors

We compared AGORA's v.92 eutherian reconstructions to DESCHRAMBLER's (300 kb resolution: APCF\_hg19\_merged.map from <http://bioinfo.konkuk.ac.kr/DESCHRAMBLER/>). Since DESCHRAMBLER uses segments of the human genome as units of the reconstruction and was based on the hg19 genome assembly, we converted those regions to their protein-coding gene content, and selected the genes still found in Ensembl v.92 and descendants of ancestral Boreoeutherian genes. The Oxford grid plots were generated with the AGORA `src/misc.compareGenomes.py` script in 'matrix' mode.

### Vertebrate evolutionary dynamics

Ancestral genomes reconstructed by AGORA from Ensembl version 102 were filtered to retain the most contiguous reconstructions, resulting in 73 ancestral genomes with G50 > 230 and L70 < 40. Conserved syntenic blocks between successive ancestral genomes in internal branches, and between ancestral genomes and their extant descendant in terminal branches were computed with PhylDiag<sup>60</sup>. Ends-of-blocks corresponding to likely evolutionary breakpoints were identified using *ad hoc* scripts. Orthologous genes between successive genomes were also compared in terms of their assignment to scaffolds or chromosomes larger than 200 genes using AGORA's `src/misc.compareGenomes.py` script in 'printOrthologousChrom' mode. Groups of at least 20 genes relocating to more than one chromosome in a descendant genome, and inversely groups of at least 20 genes from two or more ancestral chromosomes relocating on the same descendant chromosome were considered inter-chromosomal rearrangements. Breakpoint and rearrangement rates per million years were computed using branch length estimates from TimeTree<sup>61</sup>. A full description of the parameters and selection thresholds are provided in Supplementary Information.

### Data availability

The source code of AGORA, user instructions and a test dataset are available for download from <https://github.com/DyogenIBENS/Agora>. Ancestral genomes have been precomputed for ~200 vertebrate (depending on the release), 41 plant, and 222 fungi genomes and are available on the Genomicus database FTP server

(<ftp://ftp.bio.ens.psl.eu/pub/dyogen/genomicus/>). These ancestral genomes can also be explored visually within the Genomicus<sup>35</sup> synteny browser (<http://www.genomicus.bio.ens.psl.eu/genomicus>). Ancestral genomes used in this paper for  
450 analysis are archived on a Zenodo depository (<https://sandbox.zenodo.org/record/962110>).

## Acknowledgements

We thank Pierre Vincens for the coordination of computing resources and Amélie Peres for  
455 computer code engineering. This work was supported by grants from the French Government and implemented by ANR (ANR-07-GANI-008-01 GENOVERT, ANR-10-BINF-01-03 ANCESTROME, ANR-10-LABX-54 MEMOLIFE and ANR-10-IDEX-0001-02 PSL\* Research University).

## 460 References

1. Zuckerkandl, E. & Pauling, L. Molecules as documents of evolutionary history. *J. Theoret. Biol.* **8**, 357–366 (1965).
2. Felsenstein, J. Evolutionary trees from DNA sequences: a maximum likelihood approach. *J Mol Evol* **17**, 368–376 (1981).
- 465 3. Yang, Z. Phylogenetic analysis using parsimony and likelihood methods. *J Mol Evol* **42**, 294–307 (1996).
4. Nei, M. & Kumar, S. *Molecular Evolution and Phylogenetics*. (Oxford University Press, 2000).
5. Suzuki, Y. & Gojobori, T. A method for detecting positive selection at single amino  
470 acid sites. *Molecular Biology and Evolution* **16**, 1315–1328 (1999).
6. Yang, Z. & Nielsen, R. Mutation-Selection Models of Codon Substitution and Their Use to Estimate Selective Strengths on Codon Usage. *Molecular Biology and Evolution* **25**, 568–579 (2008).
7. Lupski, J. R. & Stankiewicz, P. Genomic disorders: molecular mechanisms for  
475 rearrangements and conveyed phenotypes. *PLoS Genet* **1**, e49 (2005).
8. Rowley, J. D. Letter: A new consistent chromosomal abnormality in chronic myelogenous leukaemia identified by quinacrine fluorescence and Giemsa staining. *Nature* **243**, 290–293 (1973).
9. Lupianez, D. G. *et al.* Disruptions of topological chromatin domains cause pathogenic  
480 rewiring of gene-enhancer interactions. *Cell* **161**, 1012–25 (2015).
10. Tawn, E. J. & Earl, R. The frequencies of constitutional chromosome abnormalities in an apparently normal adult population. *Mutat Res* **283**, 69–73 (1992).
11. Spielmann, M., Lupiáñez, D. G. & Mundlos, S. Structural variation in the 3D genome. *Nat Rev Genet* **19**, 453–467 (2018).
- 485 12. Despang, A. *et al.* Functional dissection of the Sox9-Kcnj2 locus identifies nonessential and instructive roles of TAD architecture. *Nat Genet* **51**, 1263–1271 (2019).
13. Schultz, J. & Dobzhansky, T. The Relation of a Dominant Eye Color in *Drosophila Melanogaster* to the Associated Chromosome Rearrangement. *Genetics* **19**, 344–64 (1934).
- 490 14. Wilson, A. C., Sarich, V. M. & Maxson, L. R. The Importance of Gene Rearrangement in Evolution: Evidence from Studies on Rates of Chromosomal, Protein and Anatomical Evolution. *Proceedings of the National Academy of Sciences* **71**, 3028–3030 (1974).

15. Sturtevant, A. H. Genetic factors affecting the strength of linkage in *Drosophila*. *Proceedings of the National Academy of Sciences of the United States of America* **3**, 555–558 (1917).
- 495 16. Dobzhansky, T. & Sturtevant, A. H. Inversions in the Chromosomes of *Drosophila Pseudoobscura*. *Genetics* **23**, 28–64 (1938).
17. Joron, M. *et al.* Chromosomal rearrangements maintain a polymorphic supergene controlling butterfly mimicry. *Nature* **477**, 203–206 (2011).
18. Lowry, D. B. & Willis, J. H. A Widespread Chromosomal Inversion Polymorphism  
500 Contributes to a Major Life-History Transition, Local Adaptation, and Reproductive Isolation. *PLOS Biology* **8**, e1000500 (2010).
19. Muñoz, A. & Sankoff, D. Detection of gene expression changes at chromosomal rearrangement breakpoints in evolution. *BMC Bioinformatics* **13 Suppl 3**, S6 (2012).
20. M. Real, F. *et al.* The mole genome reveals regulatory rearrangements associated  
505 with adaptive intersexuality. *Science* **370**, 208–214 (2020).
21. Loveland, J. L. *et al.* Functional differences in the hypothalamic-pituitary-gonadal axis are associated with alternative reproductive tactics based on an inversion polymorphism. *Hormones and Behavior* **127**, 104877 (2021).
22. Lewin, H. A. *et al.* Earth BioGenome Project: Sequencing life for the future of life.  
510 *PNAS* **115**, 4325–4333 (2018).
23. Armstrong, J. *et al.* Progressive Cactus is a multiple-genome aligner for the thousand-genome era. *Nature* **587**, 246–251 (2020).
24. Yancopoulos, S., Attie, O. & Friedberg, R. Efficient sorting of genomic permutations by translocation, inversion and block interchange. *Bioinformatics* **21**, 3340–3346 (2005).
- 515 25. Avdeyev, P., Jiang, S., Aganezov, S., Hu, F. & Alekseyev, M. A. Reconstruction of ancestral genomes in presence of gene gain and loss. 18.
26. Chauve, C., Gavranovic, H., Ouangraoua, A. & Tannier, E. Yeast Ancestral Genome Reconstructions: The Possibilities of Computational Methods II. *Journal of Computational Biology* **17**, 1097–1112 (2010).
- 520 27. Tannier, E., Zheng, C. & Sankoff, D. Multichromosomal median and halving problems under different genomic distances. *BMC Bioinformatics* **10**, 120 (2009).
28. Avdeyev, P., Jiang, S. & Alekseyev, M. A. Linearization of Median Genomes Under the Double-Cut-and-Join-Indel Model. *Evol Bioinform Online* **15**, 1176934318820534 (2019).
29. Vakirlis, N. *et al.* Reconstruction of ancestral chromosome architecture and gene repertoire reveals principles of genome evolution in a model yeast genus. *Genome Research* **26**, 918–32 (2016).
- 525 30. Chauve, C. & Tannier, E. A methodological framework for the reconstruction of contiguous regions of ancestral genomes and its application to Mammalian genomes. *PLoS Comp Biol* **4**, e1000234 (2008).
- 530 31. Ma, J. *et al.* Reconstructing contiguous regions of an ancestral genome. *Genome Research* **16**, 1557–1565 (2006).
32. Huang, X. *et al.* Ancestral Genomes: a resource for reconstructed ancestral genes and genomes across the tree of life. *Nucleic Acids Res* **47**, D271–D279 (2019).
33. Kim, J. *et al.* Reconstruction and evolutionary history of eutherian chromosomes.  
535 *Proceedings of the National Academy of Sciences* **114**, E5379–E5388 (2017).
34. Muffato, M., Louis, A., Poisnel, C. E. & Roest Crolius, H. Genomicus: a database and a browser to study gene synteny in modern and ancestral genomes. *Bioinformatics* **26**, 1119–21 (2010).
35. Nguyen, N. T. T., Vincens, P., Dufayard, J. F., Roest Crolius, H. & Louis, A.  
540 Genomicus in 2022: comparative tools for thousands of genomes and reconstructed ancestors. *Nucleic Acids Res* gkab1091 (2021) doi:10.1093/nar/gkab1091.
36. Nguyen, N. T. T., Vincens, P., Roest Crolius, H. & Louis, A. Genomicus 2018: karyotype evolutionary trees and on-the-fly synteny computing. *Nucleic acids research* **46**, D816–D822 (2018).
- 545 37. Boore, J. L. The use of genome-level characters for phylogenetic reconstruction. *Trends Ecol Evol* **21**, 439–446 (2006).

38. Rokas, null & Holland, null. Rare genomic changes as a tool for phylogenetics. *Trends Ecol Evol* **15**, 454–459 (2000).
39. Drillon, G., Champeimont, R., Oteri, F., Fischer, G. & Carbone, A. Phylogenetic Reconstruction Based on Synteny Block and Gene Adjacencies. *Mol Biol Evol* **37**, 2747–2762 (2020).
- 550 40. Zhao, T. *et al.* Whole-genome microsynteny-based phylogeny of angiosperms. *Nat Commun* **12**, 3498 (2021).
41. Manni, M., Berkeley, M. R., Seppey, M., Simão, F. A. & Zdobnov, E. M. BUSCO Update: Novel and Streamlined Workflows along with Broader and Deeper Phylogenetic Coverage for Scoring of Eukaryotic, Prokaryotic, and Viral Genomes. *Molecular Biology and Evolution* **38**, 4647–4654 (2021).
- 555 42. Mi, H. *et al.* PANTHER version 16: a revised family classification, tree-based classification tool, enhancer regions and extensive API. *Nucleic Acids Res* **49**, D394–D403 (2021).
- 560 43. Blanchette, M., Green, E. D., Miller, W. & Haussler, D. Reconstructing large regions of an ancestral mammalian genome in silico. *Genome Research* **14**, 2412–23 (2004).
44. Ferguson-Smith, M. A. & Trifonov, V. Mammalian karyotype evolution. *Nat Rev Genet* **8**, 950–62 (2007).
- 565 45. Stanyon, R., Stone, G., Garcia, M. & Froenicke, L. Reciprocal chromosome painting shows that squirrels, unlike murid rodents, have a highly conserved genome organization. *Genomics* **82**, 245–249 (2003).
46. Murat, F. *et al.* Ancestral grass karyotype reconstruction unravels new mechanisms of genome shuffling as a source of plant evolution. *Genome Research* **20**, 1545–57 (2010).
- 570 47. Romanov, M. N. *et al.* Reconstruction of gross avian genome structure, organization and evolution suggests that the chicken lineage most closely resembles the dinosaur avian ancestor. *BMC Genomics* **15**, 1060 (2014).
48. O'Connor, R. E. *et al.* Reconstruction of the diapsid ancestral genome permits chromosome evolution tracing in avian and non-avian dinosaurs. *Nature communications* **9**, 1883 (2018).
- 575 49. Jaillon, O. *et al.* Genome duplication in the teleost fish *Tetraodon nigroviridis* reveals the early vertebrate proto-karyotype. *Nature* **431**, 946–57 (2004).
50. Carbone, L. *et al.* Gibbon genome and the fast karyotype evolution of small apes. *Nature* **513**, 195–201 (2014).
- 580 51. Beklemisheva, V. R. *et al.* The Ancestral Carnivore Karyotype As Substantiated by Comparative Chromosome Painting of Three Pinnipeds, the Walrus, the Steller Sea Lion and the Baikal Seal (Pinnipedia, Carnivora). *PLoS One* **11**, e0147647 (2016).
52. Pereira, A. L. *et al.* Extensive Chromosomal Reorganization in the Evolution of New World Muroid Rodents (Cricetidae, Sigmodontinae): Searching for Ancestral Phylogenetic Traits. *PLoS One* **11**, e0146179 (2016).
- 585 53. Romanenko, S. A. *et al.* Multiple intrasyntenic rearrangements and rapid speciation in voles. *Sci Rep* **8**, 14980 (2018).
54. Rhie, A. *et al.* Towards complete and error-free genome assemblies of all vertebrate species. *Nature* **592**, 737–746 (2021).
- 590 55. Armstrong, J., Fiddes, I. T., Diekhans, M. & Paten, B. Whole-Genome Alignment and Comparative Annotation. *Annual review of animal biosciences* **7**, 41–64 (2019).
56. Cunningham, F. *et al.* Ensembl 2022. *Nucleic Acids Res* gkab1049 (2021) doi:10.1093/nar/gkab1049.
57. Yates, A. D. *et al.* Ensembl Genomes 2022: an expanding genome resource for non-vertebrates. *Nucleic Acids Res* gkab1007 (2021) doi:10.1093/nar/gkab1007.
- 595 58. Peres, A. & Roest Crolius, H. Improving duplicated nodes position in vertebrate gene trees. *BMC Bioinformatics* **16**, (2015).
59. Zdobnov, E. M. *et al.* OrthoDB in 2020: evolutionary and functional annotations of orthologs. *Nucleic Acids Res* **49**, D389–D393 (2021).



- 600 60. Lucas, J. M., Muffato, M. & Roest Crolius, H. PhylDiag: identifying complex synteny blocks that include tandem duplications using phylogenetic gene trees. *BMC Bioinformatics* **15**, 268 (2014).
61. Kumar, S., Stecher, G., Suleski, M. & Hedges, S. B. TimeTree: A Resource for Timelines, Timetrees, and Divergence Times. *Molecular Biology and Evolution* **34**, 1812–1819 (2017).
- 605

610

## Figures and Figure Legends

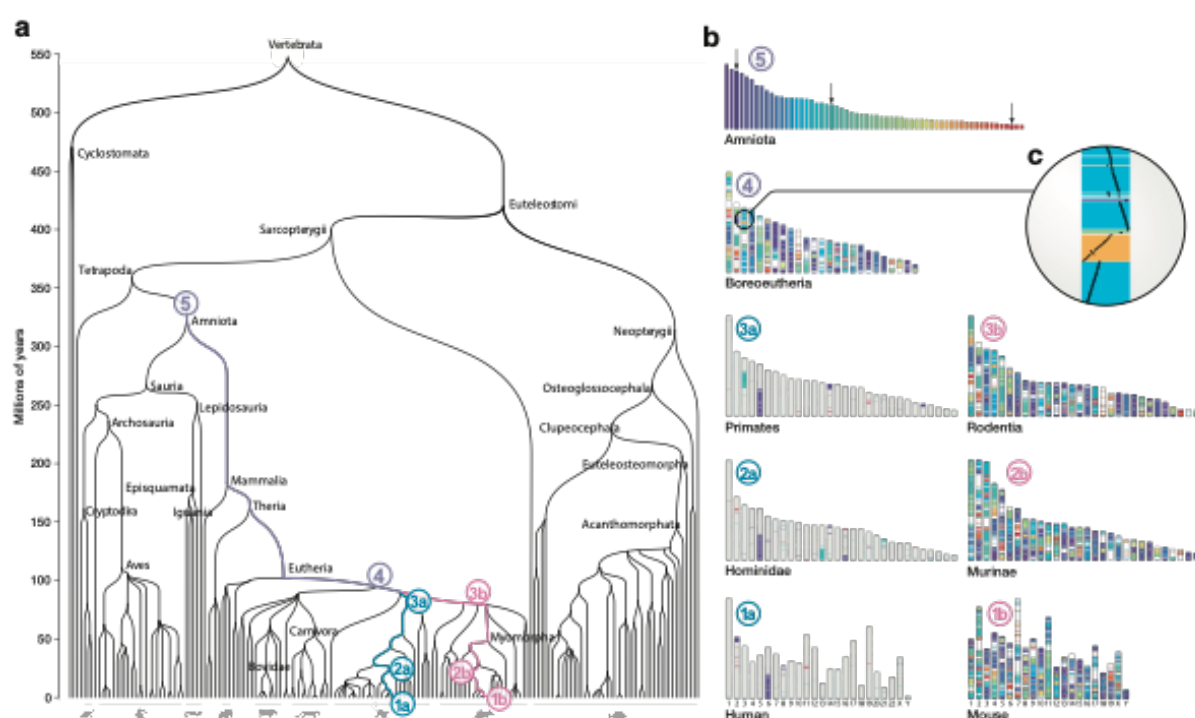

615 **Figure 1.** Reconstructing vertebrate ancestral genomes. **a.** Species phylogeny of vertebrates encompassing genomes stored in Ensembl version 92 with indications of the eight ancestral genomes detailed in panels B and the evolutionary path that they mark out. **b.** High resolution ideograms of ancestral genome reconstructions starting from the *Amniota* genome (5) and the descendant *Boreoeutheria* genome (4), where a region on the 3<sup>rd</sup> chromosome is expanded to highlight the evolution of gene organisation with respect to the *Amniota* genome. In the primate lineage (3a, 2a, 1a) only the evolution of the three *Amniota* chromosomes indicated by an arrow are depicted in colour, while in the *Rodentia* lineage (3b, 2b, 1b) the evolution of all *Amniota* chromosomes is shown.

620

625

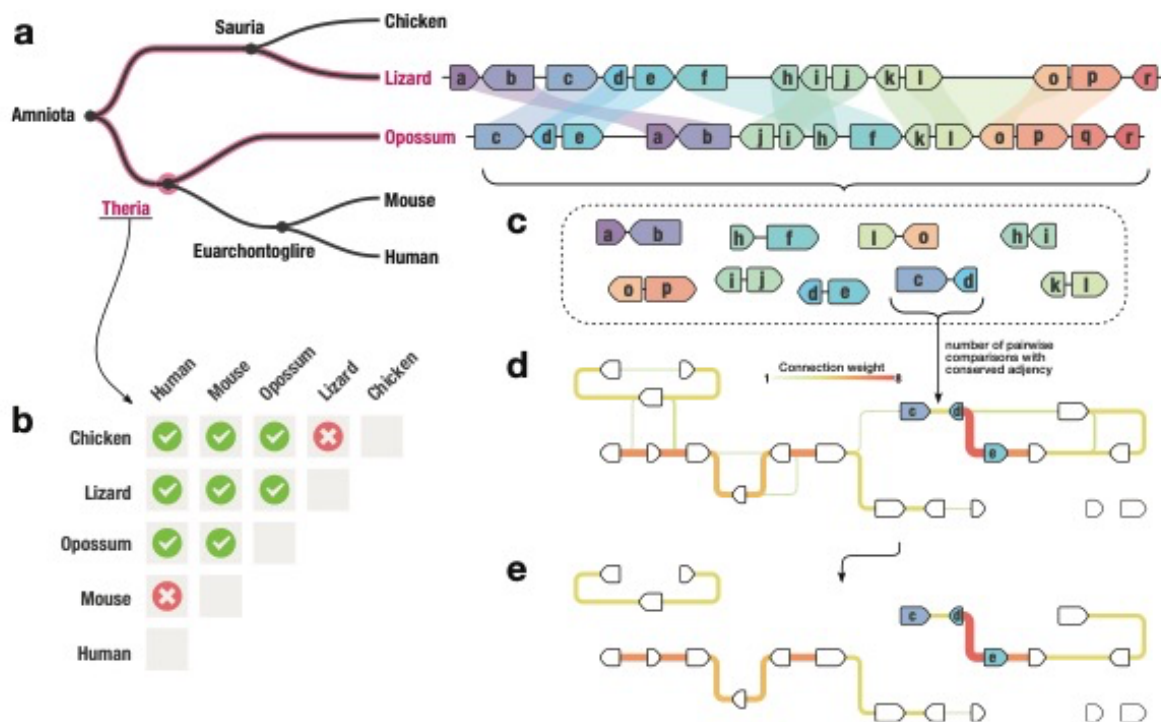

**Figure 2.** Principle of the AGORA approach. **a.** Conserved gene adjacencies are identified between all genome pairs that are informative for a given target ancestral genome. Here a portion of the Lizard and Opossum genomes are shown, with gene adjacencies joined by a pale coloured shape when conserved, and thus supporting their prior occurrence in Theria. **b.** All comparisons between genomes that are joined in an evolutionary path intersecting the target ancestor are informative (green ticks) while comparisons between genomes that diverged after the target ancestor are uninformative (red crosses). **c-d.** Conserved adjacencies observed in each pairwise comparison (**c**) are collected in a graph structure (**d**) where nodes are genes and links are conserved adjacencies weighted by the number of times they have been observed in pairwise genome comparisons. **e.** The linearisation of this graph by traversing the links of maximal weight provides contiguous and parsimonious ancestral gene order reconstructions.

640

645

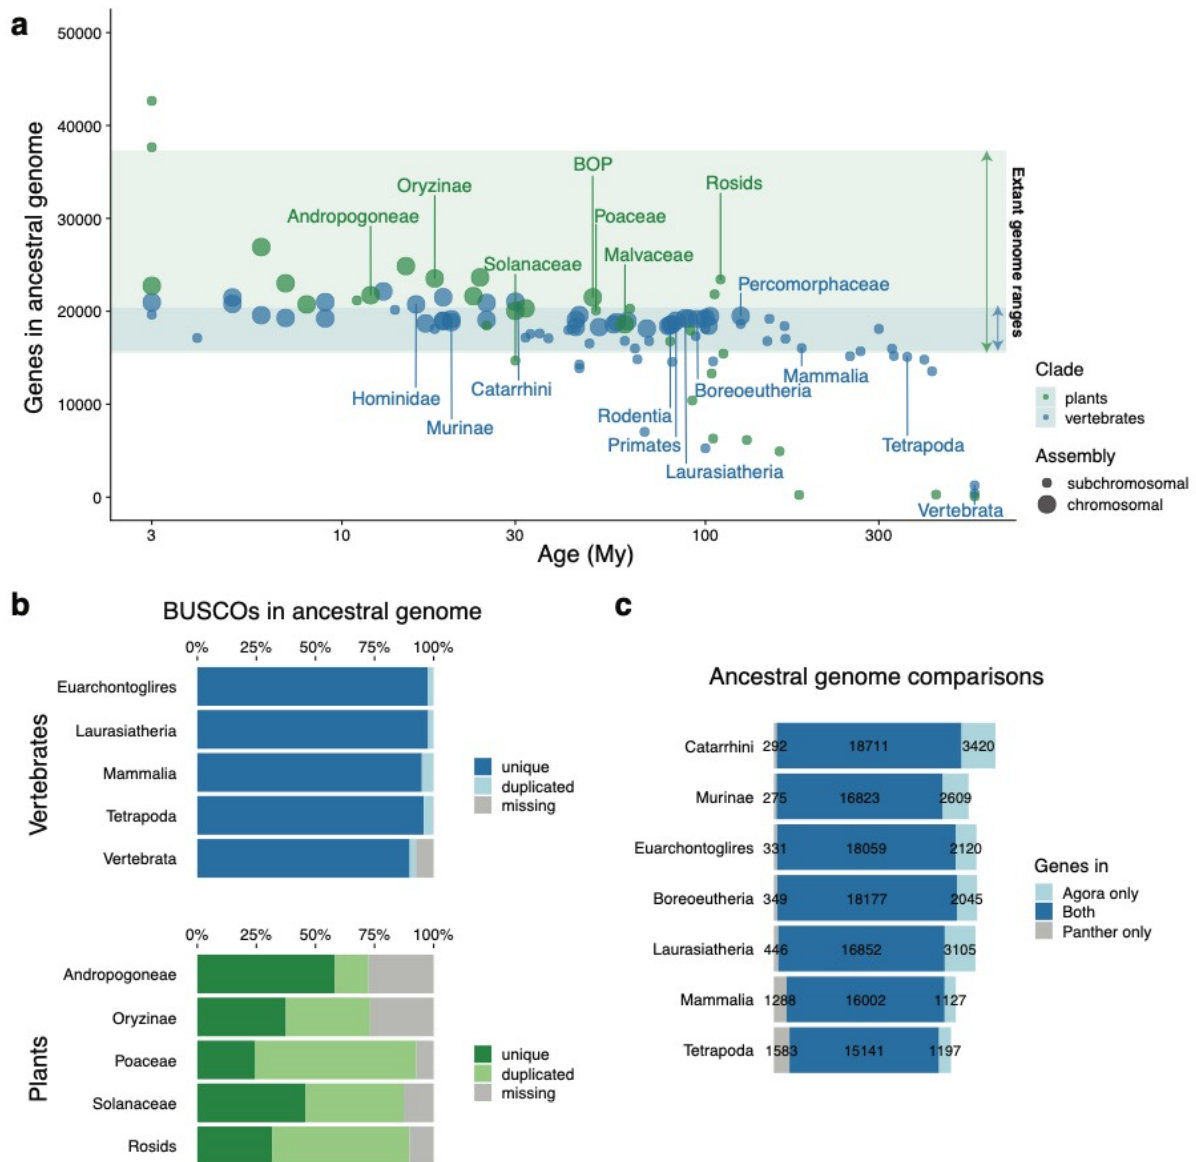

650 **Figure 3.** Completion of ancestral genomes reconstructed by AGORA. **a.** Gene content and  
 assembly continuity of 77 vertebrate and 33 plant ancestral genomes reconstructed by  
 AGORA. The ranges of gene contents of extant vertebrate and plant genomes are highlighted  
 as blue and green shading, respectively. Very young (< 2 My) or very old (> 550 My) ancestors  
 are not represented. Chromosomal and subchromosomal assemblies are as defined in  
 655 Methods. **b.** Representation of BUSCO genes in AGORA's ancestral genomes. Plant  
 genomes, which have undergone rounds of whole-genome duplications, frequently contain a  
 large fraction of duplicated genes. **c.** Comparison of ancestral gene contents inferred by  
 reconstructions from AGORA and PANTHER.

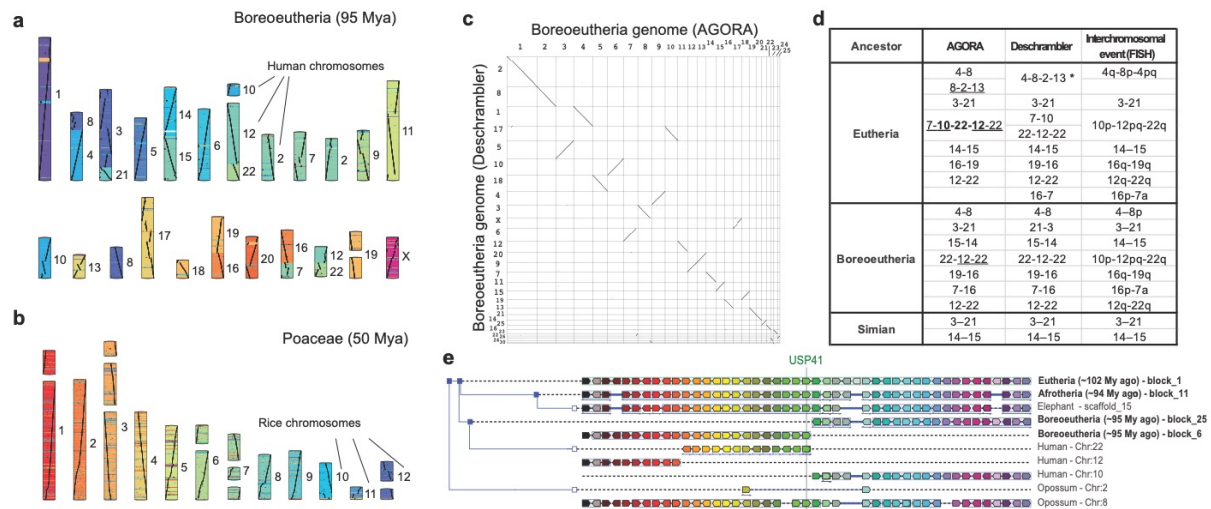

660 **Figure 4.** AGORA ancestral genome reconstructions compared to extant genomes and state-  
of-the-art ancestral reconstructions. **a.** The *Boreoeutheria* karyotype inferred by AGORA (25  
largest CARs), coloured according to gene locations on human chromosomes, as indicated to  
the right of each CAR. **b.** The *Poaceae* karyotype inferred by AGORA (19 largest CARs),  
coloured according to gene locations on *Oryza sativa* chromosomes, as indicated to the right  
665 of each CAR. **c.** Collinearity of the *Boreoeutheria* ancestral genomes reconstructed by AGORA  
and DESCHRAMBLER. **d.** Comparisons of computational reconstructions by AGORA and  
DESCHRAMBLER, and Zoo-FISH linkage groups inferred for three key mammalian ancestors.  
Human chromosomes in ancestral linkage are indicated with hyphens. The *Eutheria* bolded  
linkage group 10-22-12 is documented in more detail in **(e)**. Underlined linkage groups are  
670 documented in Fig S14. DESCHRAMBLER reconstructs a linkage group between parts of  
human chromosomes 4, 8, 12 and 3 (asterisk) in disagreement with FISH evidence and  
AGORA when used on Ensembl v.92 data; however, this linkage group is also reconstructed  
by AGORA on Ensembl data v.102, suggesting an ambiguous ancestral linkage state (Fig  
S15). **e.** Gene adjacencies around USP41 in extant species support that fragments of human  
675 chromosomes 10, 22 and 12 were linked in the *Eutheria* ancestor. Ortholog genes are shown  
in matching colours. Opossums and elephants have both retained the ancestral organisation  
at this locus, which has been rearranged in the human genome.

680

685

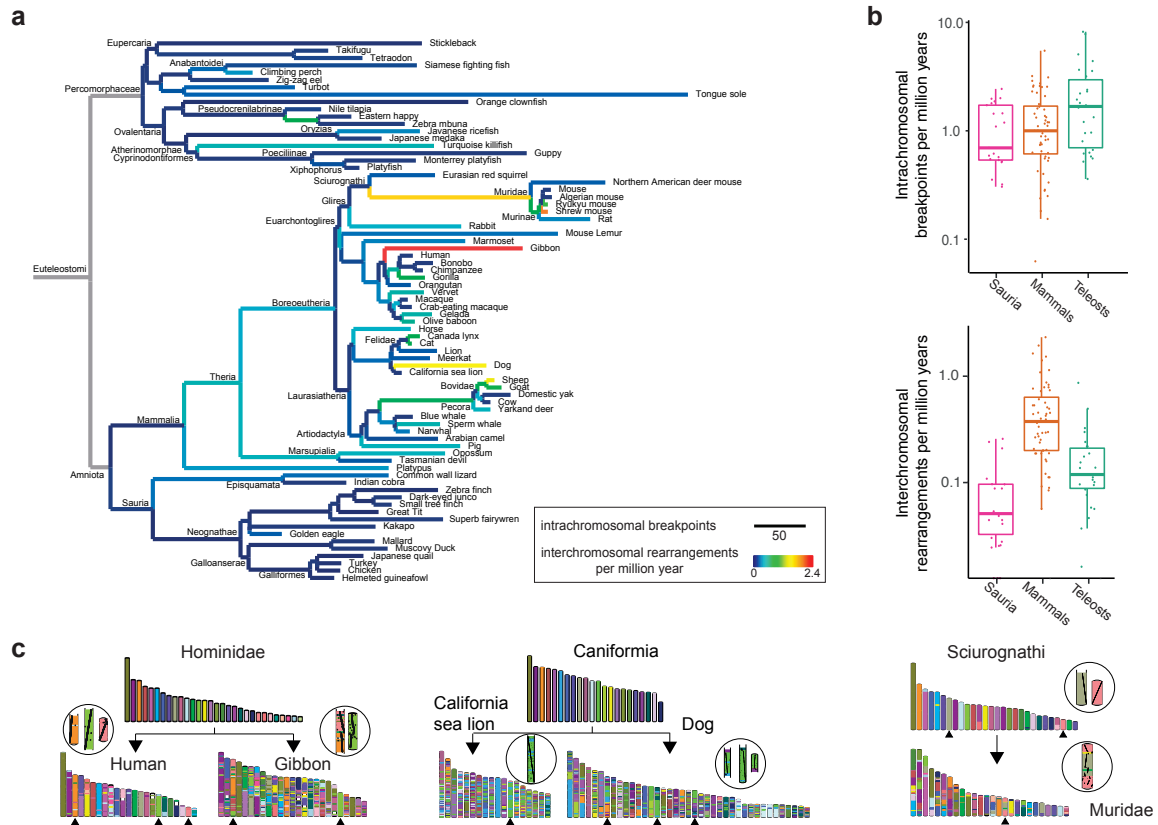

**Figure 5.** Vertebrate genome evolutionary dynamics. **a.** Phylogenetic tree of 74 extant and 73 ancestral genomes, where branch lengths represent the number of breakpoints computed between successive nodes. Colours represent the rate of interchromosomal rearrangements. 690 Branches in grey connect ancestral genomes their *Euteleostomi* root, which is too fragmented as a genome reconstruction to serve as reference for computing breakpoints and rearrangements. **b.** Distributions of breakpoints and rearrangement rates represented in **(a)**, broken down into three taxonomic groups: saurians (birds and reptiles), mammals and teleosts (fish). **c.** Examples of rearrangements in lineages with notable rates of evolution. Black upward 695 arrow heads point to chromosomes that are shown enlarged in the circles with individual orthologous genes drawn as black dots.
